# Supplementary material for: A practical approach for adoption of a hub and spoke model for cell and gene therapies in low- and middle-income countries: framework and case studies
Source: PubMed Central journal article supplement (PMC10788266; doi:10.1038/s41434-023-00425-x), 2023-10-30
Supplement: 41434_2023_425_MOESM2_ESM.pdf [file 41434_2023_425_MOESM2_ESM.pdf]

**Supplementary Table 1. Capacities matrix for beneficiaries in a CGT hub and spoke model**

| Beneficiaries |                                                                                       |     |       |               |
|---------------|---------------------------------------------------------------------------------------|-----|-------|---------------|
| Actor         | Characteristic                                                                        | Hub | Spoke | Partner Spoke |
| Donor         | Donates cells or other specimen                                                       | ✓   | ✓     | ✓             |
|               | Provides accurate information on preexisting conditions or changes in medical history | ✓   | ✓     | ✓             |
| Patient       | Gives specimen                                                                        | ✓   | ✓     | ✓             |
|               | Accepts preparatory treatments. Receives treatment                                    | ✓   | ✓     | X             |
|               | Maintains appointments, confirms personal information is accurate                     | ✓   | ✓     | ✓             |
|               | Screened for clinical trials                                                          | ✓   | ✓     | ✓             |
|               | Enrolled in clinical trials                                                           | ✓   | ✓     | X             |

CGT, cell and gene therapy.

✓, has capacity; X, does not have capacity.

Note: Cells highlighted in green indicate new roles within a hub and spoke model that are typically not present in existing models of CGT delivery.
