# Supplementary material for: A practical approach for adoption of a hub and spoke model for cell and gene therapies in low- and middle-income countries: framework and case studies
Source: PubMed Central journal article supplement (PMC10788266; doi:10.1038/s41434-023-00425-x), 2023-10-30
Supplement: 41434_2023_425_MOESM3_ESM.pdf [file 41434_2023_425_MOESM3_ESM.pdf]

**Supplementary Table 2. Capacities matrix for therapeutic center in a CGT hub and spoke model**

| Therapeutic Center                                                                    |                                                                                                                                                                    |                                                                                |       |               |   |
|---------------------------------------------------------------------------------------|--------------------------------------------------------------------------------------------------------------------------------------------------------------------|--------------------------------------------------------------------------------|-------|---------------|---|
| Actor                                                                                 | Characteristic                                                                                                                                                     | Hub                                                                            | Spoke | Partner Spoke |   |
| Health care professional                                                              | Qualified and undertakes relevant training                                                                                                                         | ✓                                                                              | ✓     | X             |   |
|                                                                                       | Collects patient medical history<br>Advises patient on and prescribes therapy selection<br>Prepares patient (or donor) for specimen collection and final treatment | ✓                                                                              | ✓     | X             |   |
|                                                                                       | Takes specimen and delivers to shipping partner<br>Administers treatment                                                                                           | ✓                                                                              | ✓     | X             |   |
|                                                                                       | Shares patient information with CGT hub                                                                                                                            | X                                                                              | ✓     | ✓             |   |
|                                                                                       | Coordinates with partner spoke regarding patient information                                                                                                       | X                                                                              | ✓     | X             |   |
|                                                                                       | Treatment coordinator                                                                                                                                              | Places the order, organizes the schedule for patient preparation and treatment | ✓     | ✓             | X |
|                                                                                       |                                                                                                                                                                    | Books the manufacturing slot                                                   | ✓     | X             | X |
| Organizes the scheduling of each stage of specimen collection                         |                                                                                                                                                                    | ✓                                                                              | ✓     | ✓             |   |
| Coordinates training for partner spokes on proper collection and shipping             |                                                                                                                                                                    | X                                                                              | ✓     | X             |   |
| Coordinates training for spokes on proper treatment, collection, and shipping         |                                                                                                                                                                    | ✓                                                                              | X     | X             |   |
| Develops standardized treatment protocols and process flows for all treatment centers |                                                                                                                                                                    | ✓                                                                              | X     | X             |   |

CGT, cell and gene therapy.

✓, has capacity; X, does not have capacity.

Note: Cells highlighted in green indicate new roles within a hub and spoke model that are typically not present in existing models of CGT delivery.
