# Supplementary material for: A practical approach for adoption of a hub and spoke model for cell and gene therapies in low- and middle-income countries: framework and case studies
Source: PubMed Central journal article supplement (PMC10788266; doi:10.1038/s41434-023-00425-x), 2023-10-30
Supplement: 41434_2023_425_MOESM4_ESM.pdf [file 41434_2023_425_MOESM4_ESM.pdf]

**Supplementary Table 3. Capacities matrix for treatment coordination in a CGT hub and spoke model**

| <b>Treatment Coordination</b>   |                                                                                                                                                                              |            |              |                      |
|---------------------------------|------------------------------------------------------------------------------------------------------------------------------------------------------------------------------|------------|--------------|----------------------|
| <b>Actor</b>                    | <b>Characteristic</b>                                                                                                                                                        | <b>Hub</b> | <b>Spoke</b> | <b>Partner Spoke</b> |
| Supply chain planner            | Ensures supply of raw materials, components, resources, etc., at various time points in the end-to-end process                                                               | ✓          | X            | X                    |
| Patient operations professional | Liaises with therapeutic centers on behalf of patients; accepts, tracks, and fulfills the therapeutic product order                                                          | ✓          | ✓            | ✓                    |
|                                 | Liaises with hub to ensure the fulfilment of CGT                                                                                                                             | ✓          | X            | X                    |
| Patient outcomes follow-up      | Liaises with therapeutic centers to track long-term patient outcomes and keeps the payer/insurance coordinator informed                                                      | ✓          | ✓            | X                    |
|                                 | Liaises with CGT registrar and collects longitudinal data on patients                                                                                                        | ✓          | ✓            | X                    |
|                                 | Shares longitudinal data with hub registrar                                                                                                                                  | ✓          | ✓            | X                    |
| CGT registrar                   | Records real-world data on therapies used, treatment conditions and evaluations, and longitudinal data on patients                                                           | ✓          | X            | X                    |
| Visibility and monitoring unit  | Monitors product and material flow across the hub and spoke                                                                                                                  | ✓          | X            | X                    |
|                                 | Ensures that the chain of identity and chain of custody are maintained                                                                                                       |            |              |                      |
| IT harmonization unit           | Works with IT departments in the hubs and spokes to facilitate and standardize collection, breakdown, and analysis of patient, tissue, transport, and manufacturing outcomes | ✓          | X            | X                    |
| E2E delivery accountable        | Coordinates all batches that are time critical, E2E, vein-to-vein, across all supply partners and shipping facilities                                                        | ✓          | X            | X                    |
| E2E quality accountable         | Coordinates the quality of all batches, bringing together the input of all supply partners and shipping facilities                                                           | ✓          | X            | X                    |
| Logistics coordinator           | Manages delivery of items from treatment center to manufacturing facility, between facilities, and from manufacturing facility back to the treatment center                  | ✓          | X            | X                    |
|                                 | Deals with any schedule changes                                                                                                                                              |            |              |                      |
|                                 | Manages delivery of blood/apheresis collected at partners to hub or spoke                                                                                                    | X          | X            | ✓                    |
|                                 | Manages delivery of items to spoke from manufacturing and from spoke to manufacturing in the hub                                                                             | X          | ✓            | X                    |

|                             |                                                                                                                                                                                                                           |   |   |   |
|-----------------------------|---------------------------------------------------------------------------------------------------------------------------------------------------------------------------------------------------------------------------|---|---|---|
| Accountant                  | Accrues and tracks orders, incoming patient material (if billed separately), works in progress, finished goods (likely using job costing for personalized medicine), and patient treatment receipt (to recognize revenue) | ✓ | ✓ | X |
| Payer/insurance coordinator | Requests and pursues appropriate payment according to the agreed schedule, including any outcome-based factors, liaising with the payer organizations (sometimes over the long term)                                      | ✓ | ✓ | X |

CGT, cell and gene therapy; E2E, end-to-end; IT, information technology.

✓, has capacity; X, does not have capacity.

Note: Cells highlighted in green indicate new roles within a hub and spoke model that are typically not present in existing models of CGT delivery.
