# Supplementary material for: A practical approach for adoption of a hub and spoke model for cell and gene therapies in low- and middle-income countries: framework and case studies
Source: PubMed Central journal article supplement (PMC10788266; doi:10.1038/s41434-023-00425-x), 2023-10-30
Supplement: 41434_2023_425_MOESM5_ESM.pdf [file 41434_2023_425_MOESM5_ESM.pdf]

**Supplementary Table 4. Capacities matrix for manufacturing in a CGT hub and spoke model**

| <b>Manufacturing</b>                         |                                                                                                                                                                               |            |              |                      |
|----------------------------------------------|-------------------------------------------------------------------------------------------------------------------------------------------------------------------------------|------------|--------------|----------------------|
| <b>Actor</b>                                 | <b>Characteristic</b>                                                                                                                                                         | <b>Hub</b> | <b>Spoke</b> | <b>Partner Spoke</b> |
| Sequencing focal point                       | Analyzes the patient specimen using NGS to produce data used in the manufacturing process (e.g., to determine which plasmids to use)                                          | ✓          | ✓            | X                    |
| Cell preprocessing production coordinator    | Offers available slots for cell preprocessing to the control tower                                                                                                            | ✓          | X            | X                    |
| Cell preprocessing production planner        | Plans the preprocessing details for all incoming batches to prepare for shipment to the main manufacturing facility                                                           | ✓          | X            | X                    |
| Plasmid production coordinator               | Fulfills the delivery schedules agreed upon with the supply chain planner and reports any issues or delays                                                                    | ✓          | X            | X                    |
| Plasmid production planner                   | Plans the manufacturing details for all incoming batches                                                                                                                      | ✓          | X            | X                    |
| Genetic manufacturing production coordinator | Offers available slots for personalized cell manufacturing or fulfills the bulk delivery schedules agreed upon with the supply chain planner and reports any issues or delays | ✓          | X            | X                    |
| Genetic manufacturing production planner     | Plans the manufacturing details for all batches of genetic vectors                                                                                                            | ✓          | X            | X                    |
| Cell production coordinator                  | Offers available slots for personalized cell manufacturing or fulfills the bulk delivery schedules agreed upon with the supply chain planner reports any delays or issues     | ✓          | X            | X                    |
| Cell production planner                      | Plans the manufacturing detail for all batches of cells                                                                                                                       | ✓          | X            | X                    |
| Quality responsible                          | Ensures the output of this part of the process meets the appropriate quality criteria                                                                                         | ✓          | ✓            | X                    |

CGT, cell and gene therapy; NGS, next-generation sequencing.

✓, has capacity; X, does not have capacity.
