# Supplementary material for: A practical approach for adoption of a hub and spoke model for cell and gene therapies in low- and middle-income countries: framework and case studies
Source: PubMed Central journal article supplement (PMC10788266; doi:10.1038/s41434-023-00425-x), 2023-10-30
Supplement: 41434_2023_425_MOESM6_ESM.pdf [file 41434_2023_425_MOESM6_ESM.pdf]

**Supplementary Table 5. Name, home institution, and state of cell technology centers and cell processing centers in Brazil**

| <b>Cell Technology Centers</b>                                              |                                                                      |              |
|-----------------------------------------------------------------------------|----------------------------------------------------------------------|--------------|
| <b>Name</b>                                                                 | <b>Home Institution</b>                                              | <b>State</b> |
| Instituto Nacional de Cardiologia                                           |                                                                      | RJ           |
| Fundação Hemocentro de Ribeirão Preto                                       | Faculdade de Medicina de Ribeirão Preto da Universidade de São Paulo | SP           |
| Centro de Biotecnologia E Terapia Celular                                   | Hospital São Rafael                                                  | BA           |
| Núcleo de Tecnologia Celular                                                | Pontificia Universidade Católica do Paraná (PUCPR)                   | PR           |
| PUC do Paraná                                                               |                                                                      |              |
| Núcleo de Terapia Celular e Molecular                                       | Faculdade de Medicina da Universidade de São Paulo                   | SP           |
| <b>Cell Processing Centers</b>                                              |                                                                      |              |
| <b>Name</b>                                                                 | <b>Home Institution</b>                                              | <b>State</b> |
| Biotec Hemoterapia                                                          | Biotec Hemoterapia                                                   | SP           |
| CCB - Centro de Criogenia Brasil                                            | Centro de Criogenia Brasil                                           | SP           |
| Centro de Biotecnologia e Terapia Celular do Hospital São Rafael (CBTC-HSR) | Hospital São Rafael                                                  | BA           |
| Centro de Hematologia do Vale                                               | Centro de Hematologia do Vale                                        | SP           |
| Centro de Tecidos Biológicos de Minas Gerais-Cetebio / Fundação Hemominas   | Fundação Hemominas                                                   | MG           |
| Colsan Associação Beneficente de Coleta de Sangue                           | Colsan                                                               | SP           |
| CPC da Fundação Hemocentro de Brasília                                      | Fundação Hemocentro de Brasília                                      | DF           |
| CPC DA Irmandade Santa Casa de Misericórdia de São Paulo                    | Distrito Federal                                                     | SP           |
| CPC da União Oeste Paranaense de Combate Ao Câncer (UOPECCAN)               | UOPECCAN                                                             | PR           |
| CPC da Unidade de Hemoterapia e Hematologia do Samaritano                   | Hospital Samaritano                                                  | SP           |
| CPC do Banco de Sangue de Caxias do Sul                                     | Condomínio Centro Médico Pasteur                                     | RS           |
| CPC do Banco de Sangue Paulista (HHMO)                                      | Banco de Sangue Paulista (HHMO)                                      | SP           |
| CPC do Hemocentro de Botucatu (HCFMB)                                       | Hospital das Clínicas de Botucatu                                    | SP           |
| CPC do Hemocentro de Santa Catarina (HEMOSC)                                | Hemocentro de Santa Catarina (HEMOSC)                                | SC           |
| CPC do Hemocentro do Ceará (HEMOCE)                                         | Hemocentro do Ceará                                                  | CE           |
| CPC do Hemonúcleo Regional Jaú                                              | Hospital Amaral Carvalho                                             | SP           |
| CPC do Hospital A C Camargo                                                 | Hospital A C Camargo                                                 | SP           |
| CPC do Hospital Angelina Caron                                              | Hospital Angelina Caron                                              | PR           |
| CPC do Hospital Araújo Jorge - Associação de Combate ao Câncer em Goiás     | Hospital Araújo Jorge - Associação de Combate ao Câncer em Goiás     | GO           |
| CPC do Hospital de Amor de Barretos (Fundação Pio XII)                      | Hospital de Amor de Barretos (Fundação Pio XII)                      | SP           |
| CPC do Hospital de Base de São José do Rio Preto                            | Hospital de Base de São José do Rio Preto                            | SP           |
| CPC do Hospital de Clínicas de Porto Alegre                                 | Hospital de Clínicas de Porto Alegre                                 | RS           |

CGT, cell and gene therapy; CPC, cell processing center.
