# Supplementary material for: A practical approach for adoption of a hub and spoke model for cell and gene therapies in low- and middle-income countries: framework and case studies
Source: PubMed Central journal article supplement (PMC10788266; doi:10.1038/s41434-023-00425-x), 2023-10-30
Supplement: 41434_2023_425_MOESM7_ESM.pdf [file 41434_2023_425_MOESM7_ESM.pdf]

**Supplementary Table 6. CGT clinical trials in Brazil: therapeutic product, CGT type, sponsor, health facilities involved, and cities**

| Therapeutic product | CGT type     | Sponsor               | Health facilities                                                                     | City |
|---------------------|--------------|-----------------------|---------------------------------------------------------------------------------------|------|
| Nestacell           | Cell therapy | Azidus Brasil         | Hospital Vera Cruz                                                                    | SP   |
|                     |              |                       | Hospital de Barueri                                                                   | SP   |
|                     |              |                       | Instituto do Coração do Hospital das Clínicas da FMUSP                                | SP   |
|                     |              |                       | UNIFESP                                                                               | SP   |
| Cilta-cel           | Cell therapy | Janssen               | Hospital São Rafael                                                                   | BA   |
|                     |              |                       | A.C. Camargo Cancer Center                                                            | SP   |
|                     |              |                       | Hospital Israelita Albert Einstein                                                    | SP   |
| COVI-MSC            | Cell therapy | Sorrento Therapeutics | Hospital São Rafael S.A. - Instituto D'Or de Pesquisa e Ensino                        | BA   |
|                     |              |                       | Santa Casa de Misericórdia da Bahia (Hospital Santa Izabel)                           | BA   |
|                     |              |                       | Saraiva & Berlinger Ltda. - EPP (IPECC)                                               | SP   |
|                     |              |                       | CECIP JAU - Centro de Estudos Clínicos do Interior Paulista Ltda.                     | SP   |
|                     |              |                       | CEMEC - Centro Multidisciplinar de Estudos Clínicos Ltda. - EPP                       | SP   |
|                     |              |                       | Impar Serviços Hospitalares S/A (Hospital Nove de Julho)                              | SP   |
| PBKR03              | Gene therapy | Passage Bio, Inc.     | Hospital de Clínicas de Porto Alegre                                                  | RS   |
| PBFT02              | Gene therapy | Passage Bio, Inc.     | Hospital das Clínicas da Universidade Federal de Minas Gerais (UFMG)                  | MG   |
|                     |              |                       | Hospital das Clínicas da Faculdade de Medicina da Universidade de São Paulo (HCFMUSP) | SP   |

|          |              |                                      |                                                                             |    |
|----------|--------------|--------------------------------------|-----------------------------------------------------------------------------|----|
| BIIB067  | RNA therapy  | Biogen                               | Associação Cruz Verde                                                       | SP |
| TNK-tPA  | Gene therapy | University of Calgary                | Hospital de Clínicas de Botucatu                                            | SP |
|          |              |                                      | Instituto Hospital de Base do Distrito Federal                              | DF |
|          |              |                                      | Hospital Universitário Maria Aparecida Pedrossian                           | MS |
|          |              |                                      | Hospital Celso Ramos Florianopolos                                          | SC |
|          |              |                                      | Hospital Geral de Fortaleza                                                 | CE |
|          |              |                                      | Clínica Neurológica e Neurocirúrgica de Joinville Ltda                      | SC |
|          |              |                                      | Porto Alegre Hospital                                                       | RS |
|          |              |                                      | Santa Casa de Porto Alegre                                                  | RS |
|          |              |                                      | Hospital de Clínicas de Ribeirão Preto                                      | SP |
|          |              |                                      | Americas Medical City                                                       | RJ |
|          |              |                                      | Hospital das Clínicas da Faculdade de Medicina da Universidade de São Paulo | SP |
|          |              |                                      | Hospital São Paulo UNIFESP                                                  | SP |
|          |              |                                      | Irmandade da Santa Casa de Misericórdia de São Paulo                        | SP |
|          |              |                                      | Hospital Estadual Central                                                   | ES |
| PBGM01   | Gene therapy | Passage Bio                          | Hospital de Clínicas de Porto Alegre                                        | RS |
| NK Cells | Cell therapy | Hospital de Clínicas de Porto Alegre | Hospital de Clínicas de Porto Alegre                                        | RS |

CGT, cell and gene therapy.
