# Supplementary material for: A practical approach for adoption of a hub and spoke model for cell and gene therapies in low- and middle-income countries: framework and case studies
Source: PubMed Central journal article supplement (PMC10788266; doi:10.1038/s41434-023-00425-x), 2023-10-30
Supplement: 41434_2023_425_MOESM8_ESM.pdf [file 41434_2023_425_MOESM8_ESM.pdf]

**Supplementary Table 7. Name, associated institution, and city of CGT manufacturers in Brazil**

| <b>CGT Manufacturers in Brazil</b>                        |                                |             |
|-----------------------------------------------------------|--------------------------------|-------------|
| <b>Name</b>                                               | <b>Associated Institution</b>  | <b>City</b> |
| Excellion Serviços Biomédicos                             |                                | RJ          |
| Farmacore                                                 |                                | SP          |
| Cryopraxis                                                |                                | RJ          |
| Hygeia Biotech                                            | Universidade de Rio de Janeiro | RJ          |
| Cellpraxis                                                |                                | SP          |
| Nucell Assistência Técnica                                | Universidade de São Paulo      | SP          |
| Associação Paranaense de Cultura – PUC-PR Campus Curitiba |                                | SP          |
| Biomarin Brasil Farmacêutica Ltda                         |                                | SP          |
| Cellavita Pesquisas Científicas Ltda                      |                                | SP          |
| Medspace do Brasil Pesquisa Clínica Ltda                  |                                | SP          |
| Novartis Biosciências S.A.                                |                                | SP          |
| Pharm Olam Serviços Clínicos Ltda                         |                                | SP          |
| Sindus Farma                                              |                                | SP          |
| Janssen Cilag Farmacêuticos                               |                                | SP          |
| Azidus Brasil                                             |                                | SP          |
| Pfizer Brazil                                             |                                | SP          |
| Biogen Brasil Produtos Farmacêuticos                      |                                | SP          |
| Hospital de Clínicas de Porto Alegre                      |                                | SP          |

CGT, cell and gene therapy.
