# Supplementary material for: A practical approach for adoption of a hub and spoke model for cell and gene therapies in low- and middle-income countries: framework and case studies
Source: PubMed Central journal article supplement (PMC10788266; doi:10.1038/s41434-023-00425-x), 2023-10-30
Supplement: 41434_2023_425_MOESM9_ESM.pdf [file 41434_2023_425_MOESM9_ESM.pdf]

**Supplementary Table 8. Coding of core capacities of a CGT hub, with each criterion assigned a distinct code**

| <b>Core Capacities of a CGT Hub</b>                                                                                                                                                                                                                                                                                                                    |             |
|--------------------------------------------------------------------------------------------------------------------------------------------------------------------------------------------------------------------------------------------------------------------------------------------------------------------------------------------------------|-------------|
| <b>A. Clinical and Research Capacities</b>                                                                                                                                                                                                                                                                                                             |             |
|                                                                                                                                                                                                                                                                                                                                                        | <b>Code</b> |
| An academic medical center located in major cities                                                                                                                                                                                                                                                                                                     | A001        |
| Previous experience in delivering CGT/leading clinical trials                                                                                                                                                                                                                                                                                          | A002        |
| Has a high number of ICU beds                                                                                                                                                                                                                                                                                                                          | A003        |
| In-house apheresis and cryopreservation capacity                                                                                                                                                                                                                                                                                                       | A004        |
| Existing and established logistics and supply chain, and storage capacity (e.g., refrigeration, deep cold storage, reconstitution)                                                                                                                                                                                                                     | A005        |
| Ability to screen, diagnose, order, store, prepare, and administer CGT                                                                                                                                                                                                                                                                                 | A006        |
| Accredited by international organizations for delivering CGT                                                                                                                                                                                                                                                                                           | A007        |
| Capacity to perform longitudinal data collection and evaluation, in collaboration with spokes                                                                                                                                                                                                                                                          | A008        |
| Immunosuppression protocols in place                                                                                                                                                                                                                                                                                                                   | A009        |
| <b>B. Manufacturing Services</b>                                                                                                                                                                                                                                                                                                                       |             |
|                                                                                                                                                                                                                                                                                                                                                        | <b>Code</b> |
| Sharing space with or physically close to a sequencing lab                                                                                                                                                                                                                                                                                             | B001        |
| Ability to establish a manufacturing network that can provide cell/tissue processing services or automated CGT manufacturing services                                                                                                                                                                                                                  | B002        |
| The manufacturing services require cell preprocessing production coordinator, cell preprocessing production planner, plasmid production coordinator, plasmid production planner, genetic manufacturing production coordinator, genetic manufacturing production planner, cell production coordinator, cell production planner, and quality responsible | B003        |
| <b>C. Human Resources</b>                                                                                                                                                                                                                                                                                                                              |             |
|                                                                                                                                                                                                                                                                                                                                                        | <b>Code</b> |
| Qualified health care professionals who can order, store, prepare, and administer at least one type of CGT                                                                                                                                                                                                                                             | C001        |
| Ability to train spokes on proper treatment, collection, and shipping                                                                                                                                                                                                                                                                                  | C002        |
| Employs a treatment coordinator, supply chain planner, patient operations professional, CGT registrar, visibility and monitoring unit, information technology harmonization unit, E2E delivery accountable, E2E quality accountable, logistics coordinator, accountant, payer/insurance coordinator                                                    | C003        |
| <b>D. Other Services</b>                                                                                                                                                                                                                                                                                                                               |             |
|                                                                                                                                                                                                                                                                                                                                                        | <b>Code</b> |
| Houses an orchestration platform, with developed IT infrastructure for proper monitoring and evaluation, as well as data sharing and analysis                                                                                                                                                                                                          | D001        |
| Existing, or ability to establish, a CGT registry                                                                                                                                                                                                                                                                                                      | D002        |
| Houses an information technology harmonization                                                                                                                                                                                                                                                                                                         | D003        |
| Houses, or is associated with, a well-developed shipping service                                                                                                                                                                                                                                                                                       | D004        |
| Regulatory services department to ensure proper regulatory oversight and compliance assistance for spokes                                                                                                                                                                                                                                              | D005        |

CGT, cell and gene therapy; E2E, end-to-end; ICU, intensive care unit; IT, information technology.
