# Supplementary material for: A practical approach for adoption of a hub and spoke model for cell and gene therapies in low- and middle-income countries: framework and case studies
Source: PubMed Central journal article supplement (PMC10788266; doi:10.1038/s41434-023-00425-x), 2023-10-30
Supplement: 41434_2023_425_MOESM10_ESM.pdf [file 41434_2023_425_MOESM10_ESM.pdf]

**Supplementary Table 9. Coding of shortlisted CGT hubs in Brazil. Each hospital was assigned an ID and the type of clinical trial was noted.**

| <b>CGT HUB Shortlisted Hospitals</b> |                                                                                               |                            |
|--------------------------------------|-----------------------------------------------------------------------------------------------|----------------------------|
| <b>ID</b>                            | <b>Hospital name</b>                                                                          | <b>Clinical trial type</b> |
| 1                                    | Hospital de Clínicas de Porto Alegre                                                          | Cell and gene therapy      |
| 2                                    | Parana's Hematology and Hemotherapy Center (HEMEPAR)                                          | Gene therapy               |
| 3                                    | Hospital Israelita Albert Einstein                                                            | Cell and gene therapy      |
| 4                                    | Hospital das Clínicas da Faculdade de Medicina da Universidade de São Paulo UNIFESP           | Cell and gene therapy      |
| 5                                    | Irmandade da Santa Casa de Misericórdia de São Paulo                                          | Gene therapy               |
| 6                                    | Hospital das Clínicas Botucatu - Unesp                                                        | Gene therapy               |
| 7                                    | Hospital das Clínicas da Faculdade de Medicina de Ribeirão Preto da Universidade de São Paulo | Cell and gene therapy      |
| 8                                    | Hospital de Base de São José do Rio Preto                                                     | Cell therapy               |
| 9                                    | Fundação Pio XII, Hospital de Câncer de Barretos                                              | Cell therapy               |
| 10                                   | Instituto Hospital de Base do Distrito Federal                                                | Gene therapy               |
| 11                                   | Hospital São Rafael Pronto Socorro                                                            | Cell and gene therapy      |
| 12                                   | Campinas Estadual University (UNICAMP) / Campinas Hemocentro                                  | Gene therapy               |
| 13                                   | Associação Cruz Verde                                                                         | Gene therapy               |
| 14                                   | Centro de Hematologia e Hemoterapia do Espírito Santo                                         | Gene therapy               |
| 15                                   | Clinica Neurologica e Neurocirurgica de Joinville Ltda                                        | Gene therapy               |
| 16                                   | Complexo Hospitar Universitário Prof. Edgard Santos (HUPES)                                   | Gene therapy               |
| 17                                   | Hospital Celso Ramos Florianopolos                                                            | Gene therapy               |
| 18                                   | Hospital de Barueri                                                                           | Cell therapy               |
| 19                                   | Hospital Estadual Central                                                                     | Gene therapy               |
| 20                                   | Hospital Geral de Fortaleza                                                                   | Gene therapy               |
| 21                                   | Hospital Mario Covas                                                                          | Cell therapy               |

|    |                                                                      |                       |
|----|----------------------------------------------------------------------|-----------------------|
| 22 | Hospital Sírio Libanês                                               | Gene therapy          |
| 23 | Hospital Universitário Maria Aparecida Pedrossian                    | Gene therapy          |
| 24 | Hospital Vera Cruz                                                   | Cell therapy          |
| 25 | Instituto Estadual de Hematologia Arthur de Siqueira Cavalcanti      | Gene therapy          |
| 26 | Instituto Nacional de Câncer José Alencar Gomes da Silva - INCA      | Cell therapy          |
| 27 | Santa Casa de Porto Alegre                                           | Gene therapy          |
| 28 | American Medical City                                                | Gene therapy          |
| 29 | Hospital São Paulo UNIFESP                                           | Cell and gene therapy |
| 30 | Hospital das Clínicas da Universidade Federal de Minas Gerais (UFMG) | Gene therapy          |
| 31 | CEMEC - Centro Multidisciplinar de Estudos Clínicos Ltda. - EPP      | Cell therapy          |
| 32 | Impar Serviços Hospitalares S/A (Hospital Nove de Julho)             | Cell therapy          |
| 33 | A.C. Camargo Cancer Center                                           | Cell therapy          |
| 34 | Santa Casa de Misericórdia da Bahia (Hospital Santa Izabel)          | Cell therapy          |
| 35 | CECIP JAU                                                            | Gene therapy          |

CGT, cell and gene therapy.
