# Supplementary material for: A practical approach for adoption of a hub and spoke model for cell and gene therapies in low- and middle-income countries: framework and case studies
Source: PubMed Central journal article supplement (PMC10788266; doi:10.1038/s41434-023-00425-x), 2023-10-30
Supplement: 41434_2023_425_MOESM11_ESM.pdf [file 41434_2023_425_MOESM11_ESM.pdf]

**Supplementary Table 10. Facility names and countries of cell processing centers in the MENA region**

| <b>Potential Cell Processing Centers in the MENA Region</b> |                |                                             |                |
|-------------------------------------------------------------|----------------|---------------------------------------------|----------------|
| <b>Facility</b>                                             | <b>Country</b> | <b>Facility</b>                             | <b>Country</b> |
| Future Health                                               | Bahrain        | Biovault                                    | Lebanon        |
| LifeCell Arabia                                             | Bahrain        | Biomax                                      | Lebanon        |
| Biovault                                                    | Bahrain        | Lifeline                                    | Lebanon        |
| Cells4Life                                                  | Bahrain        | Reviva                                      | Lebanon        |
| Cryoviva Bahrain                                            | Bahrain        | Future Health                               | Morocco        |
| Smart Cells                                                 | Egypt          | Smart Cells                                 | Oman           |
| Cell Safe Cord Blood Bank                                   | Egypt          | CellSave                                    | Oman           |
| Cells4Life                                                  | Egypt          | cryoviva                                    | Oman           |
| CellSave                                                    | Egypt          | Sultan Qaboos University Hospital           | Oman           |
| Cell Safe                                                   | Egypt          | BabyCord                                    | Palestine      |
| StemPlus                                                    | Egypt          | Virgin Health Bank                          | Qatar          |
| Center for Stem Cell Research & Regenerative Medicine       | Egypt          | Future Health Biobank                       | Qatar          |
| Smart Cells                                                 | Jordan         | Cells4Life                                  | Qatar          |
| BabyCord                                                    | Jordan         | CellSave                                    | Qatar          |
| Future Health                                               | Jordan         | Smart Cells                                 | Saudi Arabia   |
| KHCC                                                        | Jordan         | Dubai Cord Blood and Research Center (DCRC) | UAE            |
| Future Health                                               | Kuwait         | Medcells                                    | UAE            |
| LifeCell Arabia                                             | Kuwait         | Smart Cells                                 | UAE            |
| Smart Cells                                                 | Kuwait         | Future Health                               | UAE            |
| Cells4Life                                                  | Kuwait         | Family Bank LifeCell                        | UAE            |
| CellSave                                                    | Kuwait         | Cells4Life Middle East                      | UAE            |
| Smart Cells                                                 | Lebanon        | Cryoviva Gulf                               | UAE            |
| health                                                      | Lebanon        |                                             |                |

CGT, cell and gene therapy; MENA, Middle East and North Africa; UAE, United Arab Emirates.
