# Supplementary material for: A practical approach for adoption of a hub and spoke model for cell and gene therapies in low- and middle-income countries: framework and case studies
Source: PubMed Central journal article supplement (PMC10788266; doi:10.1038/s41434-023-00425-x), 2023-10-30
Supplement: 41434_2023_425_MOESM12_ESM.pdf [file 41434_2023_425_MOESM12_ESM.pdf]

**Supplementary Table 11. CGT clinical trials in the MENA region: therapeutic product, CGT type, sponsor, health facilities, and countries**

| CGT Clinical Trials in the MENA Region |                       |                                              |                                                   |              |
|----------------------------------------|-----------------------|----------------------------------------------|---------------------------------------------------|--------------|
| Therapeutic product                    | CGT type              | Sponsor                                      | Health facilities                                 | Country      |
| Nusinersen                             | Gene therapy          | Biogen                                       | Saint George University Hospital Medical Center   | Lebanon      |
|                                        |                       |                                              | King Fahad Specialist Hospital –Dammam            | Saudi Arabia |
|                                        |                       |                                              | King Faisal Specialist Hospital & Research Center | Saudi Arabia |
| FLT201                                 | Gene therapy          | Freeline Therapeutics                        | La Rabta Hospital                                 | Tunisia      |
| hMaxi-K                                | Gene therapy          | Urovant Sciences Gmbh                        | Dasman Diabetes Institute                         | Kuwait       |
| PF-07055480                            | Gene therapy          | Pfizer                                       | King Fahad Specialist Hospital – Dammam           | Saudi Arabia |
| rAAV2-VMD2-hMERTK                      | Gene therapy          | King Khaled Eye Specialist Hospital          | King Fahad Specialist Hospital –Dammam            | Saudi Arabia |
| PF-06838435                            | Gene therapy          | Pfizer                                       | King Fahad Specialist Hospital – Dammam           | Saudi Arabia |
| hLB-001                                | Gene therapy          | Logicbio Therapeutics                        | King Abdullah Specialist Children Hospital        | Saudi Arabia |
| Prove                                  | Cell and gene therapy | Ain Shams University                         | Ain Shams University                              | Egypt        |
| MSCs therapy                           | Cell therapy          | Aljazeera Hospital                           | Aljazeera (Al Gazeera) Hospital                   | Egypt        |
| PRP and cord blood                     | Cell therapy          | Aljazeera Hospital                           | Aljazeera Hospital                                | Egypt        |
| Lipogems                               | Cell therapy          | American University of Beirut Medical Center | American University of Beirut                     | Lebanon      |
| JNJ-68284528                           | Cell therapy          | Janssen                                      | King Faisal Specialist Hospital & Research Center | Saudi Arabia |
| MSCs therapy                           | Cell therapy          | University of Jordan                         | University of Jordan                              | Jordan       |
| SLN124                                 | Gene therapy          | Silence Therapeutics                         | Jordan University Hospital                        | Jordan       |
|                                        |                       |                                              | King Hussein Cancer Center                        | Jordan       |
|                                        |                       |                                              | Irbid Specialty Hospital                          | Jordan       |
| MSCs                                   | Cell therapy          | University of Jordan                         | University of Jordan                              | Jordan       |
| MSC-PLGA                               | Cell therapy          | University of Jordan                         | University of Jordan                              | Jordan       |
| WJ-MSCs                                | Cell therapy          | University of Jordan                         | University of Jordan                              | Jordan       |

CGT, cell and gene therapy; MENA, Middle East and North Africa; MSC, mesenchymal stem cells; PLGA, poly(lactic-co-glycolic acid); WJ-MSC, Wharton's jelly-Mesenchymal stem cell.
