# Supplementary material for: A practical approach for adoption of a hub and spoke model for cell and gene therapies in low- and middle-income countries: framework and case studies
Source: PubMed Central journal article supplement (PMC10788266; doi:10.1038/s41434-023-00425-x), 2023-10-30
Supplement: 41434_2023_425_MOESM13_ESM.pdf [file 41434_2023_425_MOESM13_ESM.pdf]

**Supplementary Table 12. Coding of shortlisted CGT hubs in the MENA region. Each hospital was assigned an ID and the type of clinical trial was noted.**

| <b>CGT HUB Shortlisted Hospitals</b> |                                                           |                |
|--------------------------------------|-----------------------------------------------------------|----------------|
| <b>ID</b>                            | <b>Hospital Name</b>                                      | <b>Country</b> |
| 1                                    | Cleveland Clinic Abu Dhabi                                | UAE            |
| 2                                    | ADSCC                                                     | UAE            |
| 3                                    | Bioscience Clinic Middle East                             | UAE            |
| 4                                    | Hamad General Hospital                                    | Qatar          |
| 5                                    | Sidra Medicine                                            | Qatar          |
| 6                                    | Ain Shams University                                      | Egypt          |
| 7                                    | Aljazeera Hospital                                        | Egypt          |
| 8                                    | American University of Beirut                             | Lebanon        |
| 9                                    | Dasman Diabetes Institute                                 | Kuwait         |
| 10                                   | Irbid Speciality Hospital                                 | Jordan         |
| 11                                   | Jordan University Hospital                                | Jordan         |
| 12                                   | King Abdullah Specialist Children Hospital                | Saudi Arabia   |
| 13                                   | King Fahad Specialist Hospital – Dammam                   | Saudi Arabia   |
| 14                                   | King Faisal Specialist Hospital & Research Center, Riyadh | Saudi Arabia   |
| 15                                   | King Hussein Cancer Center                                | Jordan         |
| 16                                   | La Rabta Hospital                                         | Tunisia        |
| 17                                   | Saint George University Hospital Medical Center           | Lebanon        |

CGT, cell and gene therapy; MENA, Middle East and North Africa; UAE, United Arab Emirates.
